# Supplementary material
Source: PubMed Central journal article supplement (PMC9843986)
Supplement: 40834_2022_204_MOESM1_ESM.pdf [file 40834_2022_204_MOESM1_ESM.pdf]

# Patients Experiences with Hormonal Contraception and Contraception Counseling

## Demographics

What is your gender identity?

- Cisgender female
- Cisgender male
- Transgender female
- Transgender male
- Non-binary
- Other
- Prefer not to say

Other

\_\_\_\_\_

How old are you?

\_\_\_\_\_

Which category best describes you? (select all that apply)

- White
- Black or African American
- Asian
- Native-American
- Middle Eastern or North African
- Native Hawaiian or Pacific Islander
- Hispanic/Latino/Spanish
- Other
- Prefer not to say

Other

\_\_\_\_\_

What is your current occupation?

- Undergraduate student
- Graduate Student
- Service industry (Food service, retail, etc.)
- Healthcare worker (Nurse, Doctor, etc.)
- Businessperson (Law, Sales, Finance, etc.)
- Entertainment/Arts
- Homemaker
- Unemployed
- Other (please specify)

Other

\_\_\_\_\_

What is the highest level of education you have completed?

- High School
- Undergraduate Degree (Bachelor's or Associates)
- Masters degree
- Doctorate Degree
- Other

Other

\_\_\_\_\_

---

What is your sexual orientation?

- Heterosexual  
 Homosexual  
 Bisexual or Pansexual  
 Asexual  
 Queer  
 Other

---

Other

---

---

Have you ever been pregnant?

- Yes  
 No

---

How many times have you been pregnant?

---

---

Have you ever had an elective abortion?

- Yes  
 No

---

How many times have you given birth?

---

---

What is your current relationship status?

- Married  
 Single, sexually active  
 Single, not sexually active  
 Divorced  
 Other

---

Other

---

---

Have you ever used hormonal contraception (eg. oral contraceptive pills, implant, the patch, injections, IUD)?

- Yes  
 No

---

Have you ever received contraception counseling from a healthcare provider?

- Yes  
 No  
(Contraception counseling occurs when a healthcare provider educates patients and answers questions about various methods of birth control and the risks/benefits associated with different methods.)

---

Thank you for taking this survey! You may skip to the end of the survey and click "submit".

---

---

At what age did you start using contraception?

---

---

What was the first kind of hormonal contraception you used?

- Oral Contraceptive Pills  
 IUD (Intrauterine device)  
 Depo-provera (The Shot)  
 Nexplanon (Implant)  
 The Patch  
 NuvaRing  
 Other  
(For this question, contraception does not include the use of barrier methods such as condoms.)

---

Other

---

---

Who prescribed you your first hormonal contraception?

- Gynecologist
  - Primary Care Doctor
  - Pediatrician
  - Other
- 

Other

---

---

For what reason(s) did you start using hormonal contraception? (Select all that apply)

- Pregnancy prevention
  - Acne
  - Heavy periods
  - Irregular periods
  - Painful periods
  - Premenstrual symptoms
  - Other
- 

Other

---

**How much did each of the following factors influence your choice of contraceptive method?**

|                                      | Not at all            | Very little           | Somewhat              | To a great extent     | Not applicable        |
|--------------------------------------|-----------------------|-----------------------|-----------------------|-----------------------|-----------------------|
| Prescriber Preference/Recommendation | <input type="radio"/> | <input type="radio"/> | <input type="radio"/> | <input type="radio"/> | <input type="radio"/> |
| Experiences of Friends/Peers         | <input type="radio"/> | <input type="radio"/> | <input type="radio"/> | <input type="radio"/> | <input type="radio"/> |
| Experiences of Family Members        | <input type="radio"/> | <input type="radio"/> | <input type="radio"/> | <input type="radio"/> | <input type="radio"/> |
| Concerns about side effects          | <input type="radio"/> | <input type="radio"/> | <input type="radio"/> | <input type="radio"/> | <input type="radio"/> |
| Cost                                 | <input type="radio"/> | <input type="radio"/> | <input type="radio"/> | <input type="radio"/> | <input type="radio"/> |
| Ease of Use                          | <input type="radio"/> | <input type="radio"/> | <input type="radio"/> | <input type="radio"/> | <input type="radio"/> |
| Efficacy/Failure Rate                | <input type="radio"/> | <input type="radio"/> | <input type="radio"/> | <input type="radio"/> | <input type="radio"/> |
| Things you've read online            | <input type="radio"/> | <input type="radio"/> | <input type="radio"/> | <input type="radio"/> | <input type="radio"/> |
| Level of invasiveness                | <input type="radio"/> | <input type="radio"/> | <input type="radio"/> | <input type="radio"/> | <input type="radio"/> |

What other factors influenced your contraception decisions?

\_\_\_\_\_

What types of contraception have you used in your lifetime? (select all that apply)

- Intrauterine device (IUD)
- Oral Contraceptive Pills
- Male Condoms
- Female Condoms
- Nuvaring
- Nexplanon (Implant)
- Depo-Provera (injection)
- The Patch
- Withdrawal
- Fertility awareness method (aka The Rhythm)
- Other

Other

\_\_\_\_\_

What type of contraception are you currently using?

- Intrauterine device (IUD)
- Oral Contraceptive Pills
- Male Condoms
- Female Condoms
- Nuvaring
- Nexplanon (Implant)
- Depo-Provera (Injection)
- Withdrawal
- The Patch
- Fertility awareness method (aka The Rhythm)
- Other
- Not currently using contraception

Other

\_\_\_\_\_

If you have switched contraception methods or stopped using hormonal contraception, what was your reason?

- Desire to become pregnant
- No longer sexually active
- Loss of access
- Difficulty remembering a daily pill
- Side Effects
- Other

---

Other

---

In your lifetime, have you ever experienced side effects associated with your contraception? (select all that apply)

- Acne
- Cramps/Pain
- Irregular menstrual bleeding
- Loss of libido/sexual satisfaction
- Mood changes
- Weight gain
- Other (please specify)
- No side effects

---

Other

---

What side effect(s) bothered you the most?

---

**The following questions will assess your experience(s) with contraception counseling prior to initiating contraception and throughout your lifetime. Please rate how much you agree with the following statements.**

|                                                                                                                                                                     | Strongly disagree     | Somewhat disagree     | Somewhat agree        | Strongly agree        | Not applicable/no opinion |
|---------------------------------------------------------------------------------------------------------------------------------------------------------------------|-----------------------|-----------------------|-----------------------|-----------------------|---------------------------|
| "Prior to initiating hormonal contraception, my provider adequately counseled me about risks, benefits, side effects and alternatives of available contraceptives." | <input type="radio"/> | <input type="radio"/> | <input type="radio"/> | <input type="radio"/> | <input type="radio"/>     |
| "If/when I experienced side effects associated with my hormonal contraception, my provider adequately addressed my concerns."                                       | <input type="radio"/> | <input type="radio"/> | <input type="radio"/> | <input type="radio"/> | <input type="radio"/>     |
| "I trust my provider to be open with me about the side effects and risks of hormonal contraception"                                                                 | <input type="radio"/> | <input type="radio"/> | <input type="radio"/> | <input type="radio"/> | <input type="radio"/>     |
| "My provider(s) have always been on my side and worked with me to come up with the best method of contraception for me."                                            | <input type="radio"/> | <input type="radio"/> | <input type="radio"/> | <input type="radio"/> | <input type="radio"/>     |
| "My provider is unbiased in their counseling"                                                                                                                       | <input type="radio"/> | <input type="radio"/> | <input type="radio"/> | <input type="radio"/> | <input type="radio"/>     |

During contraception counseling, did your provider ever discuss the possibility of psychological or sexual side effects?  Yes  No

What did they tell you?

|                                                                                                | Very negative         | Somewhat negative     | Neutral, no opinion   | Somewhat positive     | Very positive         | Not applicable, unsure |
|------------------------------------------------------------------------------------------------|-----------------------|-----------------------|-----------------------|-----------------------|-----------------------|------------------------|
| Overall, when you think about your experience(s) with hormonal contraception, how do you feel? | <input type="radio"/> | <input type="radio"/> | <input type="radio"/> | <input type="radio"/> | <input type="radio"/> | <input type="radio"/>  |

**The following questions are about your mental health history. Please answer only if you feel comfortable.**

Have you suffered from or been treated for a psychiatric condition?  Yes  No

Please specify \_\_\_\_\_

At what age were you first diagnosed with and/or treated for a psychiatric condition? \_\_\_\_\_

Did you notice any changes in your psychiatric symptoms with hormonal contraception?  Yes, mood symptoms worsened with hormonal contraception  Yes, mood symptoms improved with hormonal contraception  No change in mood symptoms with hormonal contraception  Unsure or not applicable

Is there anything else you would like to share about your experience with contraception and/or contraception counseling? \_\_\_\_\_
